# Supplementary material for: Synthetic Fatty Acids Prevent Plasmid-Mediated Horizontal Gene Transfer
Source: PubMed Central journal article supplement — mBio. 2015 Sep 1;6(5):e01032-15. doi: 10.1128/mBio.01032-15 (PMC4556808; doi:10.1128/mbio.01032-15), 2015-09-01
Supplement: mbo004152448s1.pdf [file mbo004152448s1.pdf]

## Supplemental materials and methods

**Bacterial strains and plasmids.** *Escherichia coli* strain DH5 $\alpha$  (1) containing conjugative plasmid pJC01 was used as donor strain and streptomycin-resistant derivative *E. coli* BL21 (DE3) (2) was used as recipient strain expressing T7 RNA polymerase in HTC assay. *E. coli* DH5 $\alpha$  (1) containing different conjugative and mobilizable plasmids (Table S1) and a rifampicin-resistant derivative of *E. coli* MDS52 (3) were used as donor and recipient strains respectively in plate-conjugation assays. *Salmonella enterica* Serovar *typhimurium* SV4522 was used as donor strain of a kanamycin-resistant derivative of pSLT plasmid (4). *Acinetobacter baumannii* ATCC 19606 (provided by Hospital de Valdecilla, Spain), *Vibrio cholera* N16961 (provided by Didier Mazel, Institut Pasteur, France), *Salmonella enterica* Serovar *typhimurium* SV4939 (provided by Dr. J. Casadesús, Universidad de Sevilla, Spain), *Agrobacterium tumefaciens* C58 (provided by Dr D. Pérez-Mendoza, Estación Experimental del Zaidín, Spain) and *Pseudomonas putida* KT2440 (provided by Dr. F. Rojo, Centro Nacional de Biotecnología, Spain) were used as donor strains of R388. Nalidixic and rifampicin-resistant derivatives of *E. coli* BW27783 (5) were used as donor (containing R1drd19 plasmid) and recipient strains respectively in liquid matings. *E. coli* DH5 $\alpha$  (1) containing pHP161 (6) and pKM101 $\Delta$ MOB (7) was used as donor strain to combine *oriT*-MOB of R388 and MPF apparatus of pKM101, respectively.

**Reagents.** When appropriate, antibiotics (Apollo) were added at the following concentrations: ampicillin sodium salt (Ap; 100  $\mu$ g/ml), chloramphenicol (Cm; 25  $\mu$ g/ml), nalidixic acid (Nx; 20  $\mu$ g/ml), rifampicin (Rif; 50  $\mu$ g/ml), streptomycin (Sm;

300 µg/ml), tetracycline (Tc; 10 µg/ml) and trimethoprim (Tp; 10 µg/ml). DMSO (Sigma-Aldrich) was used as solvent and IPTG (Sigma-Aldrich) as T7 RNA polymerase inductor. Bacterial cultures were set up in LB-broth and LB-agar (Pronadisa). M9 broth (Sigma-Aldrich) were used to resuspend bacteria after mating and perform serial dilutions.

**Construction of pJC01.** The *Xba*I fragment of plasmid pUA66 (8) encoding the GFPmut2 protein (9) was inserted into the *Xba*I site of plasmid pET3a (Novagen) to obtain pETGFP3, where the *gfpmut2* gene is under the control of the T7  $\phi$ 10 promoter. Then, the chloramphenicol resistance gene (*Cm<sup>r</sup>*) from pSB1C3 (<http://parts.igem.org/Part:pSB1C3>) was amplified by PCR using the primers *Cm<sup>r</sup>* sense (CGTAAGATCTTCCAACCTTTCACCATAATG) and *Cm<sup>r</sup>* antisense (AGCTAGATCTCAAATTACGCCCCGCCCTG), which introduce *Bgl*II sites at both ends of the amplicon. The *Cm<sup>r</sup>* fragment was digested with *Bgl*II and inserted in the same site of pETGFP3 (flanking the *gfpmut2* gene in a divergent orientation) to obtain the construct pETGFP-*Cm6*. This plasmid was used as template to amplify the region containing the adjacent (and divergent) genes *gfpmut2* and *Cm<sup>r</sup>* by PCR using the primers Sense-*Eco*RI (CAGCGAATTCAGCTTCCTTTTCGGCTTTG) and Antisense-*Sac*I (AGTGGCGAGCTCGATCTTCCCCATCGGTG). Subsequently, the amplified *gfpmut2-Cm<sup>r</sup>* cassette was digested with *Eco*RI and *Sac*I enzymes and inserted into the conjugative plasmid R388 (10), previously digested with the same enzymes, to obtain the final construction pJC01.

## References

1. Grant, S. G., Jessee, J., Bloom, F. R., Hanahan, D. 1990. Differential plasmid rescue from transgenic mouse DNAs into *Escherichia coli* methylation-restriction mutants. *Proc. Natl. Acad. Sci. U. S. A.* 87:4645-4649.
2. Studier, F. W., Moffatt, B. A. 1986. Use of bacteriophage T7 RNA polymerase to direct selective high-level expression of cloned genes. *J. Mol. Biol.* 189:113-130.
3. Posfai, G., Plunkett, G., 3rd, Feher, T., Frisch, D., Keil, G. M., Umenhoffer, K., Kolisnychenko, V., Stahl, B., Sharma, S. S., de Arruda, M., Burland, V., Harcum, S. W., Blattner, F. R. 2006. Emergent properties of reduced-genome *Escherichia coli*. *Science* 312:1044-1046.
4. Camacho, E. M., Casadesus, J. 2002. Conjugal transfer of the virulence plasmid of *Salmonella enterica* is regulated by the leucine-responsive regulatory protein and DNA adenine methylation. *Mol. Microbiol.* 44:1589-1598.
5. Khlebnikov, A., Skaug, T., Keasling, J. D. 2002. Modulation of gene expression from the arabinose-inducible *araBAD* promoter. *Journal of industrial microbiology & biotechnology* 29:34-37.
6. Fernandez-Gonzalez, E., de Paz, H. D., Alperi, A., Agundez, L., Faustmann, M., Sangari, F. J., Dehio, C., Llosa, M. 2011. Transfer of R388 derivatives by

a pathogenesis-associated type IV secretion system into both bacteria and human cells. *J. Bacteriol.* 193:6257-6265.

7. Draper, O., Cesar, C. E., Machon, C., de la Cruz, F., Llosa, M. 2005. Site-specific recombinase and integrase activities of a conjugative relaxase in recipient cells. *Proc. Natl. Acad. Sci. U. S. A.* 102:16385-16390.
8. Zaslaver, A., Bren, A., Ronen, M., Itzkovitz, S., Kikoin, I., Shavit, S., Liebermeister, W., Surette, M. G., Alon, U. 2006. A comprehensive library of fluorescent transcriptional reporters for *Escherichia coli*. *Nature methods* 3:623-628.
9. Cormack, B. P., Valdivia, R. H., Falkow, S. 1996. FACS-optimized mutants of the green fluorescent protein (GFP). *Gene* 173:33-38.
10. Datta, N., Hedges, R. W. 1972. Trimethoprim resistance conferred by W plasmids in *Enterobacteriaceae*. *J. Gen. Microbiol.* 72:349-355.
