# Supplementary material for: Synthetic Fatty Acids Prevent Plasmid-Mediated Horizontal Gene Transfer
Source: PubMed Central journal article supplement — mBio. 2015 Sep 1;6(5):e01032-15. doi: 10.1128/mBio.01032-15 (PMC4556808; doi:10.1128/mbio.01032-15), 2015-09-01
Supplement: mbo004152448sf1.pdf [file mbo004152448sf1.pdf]

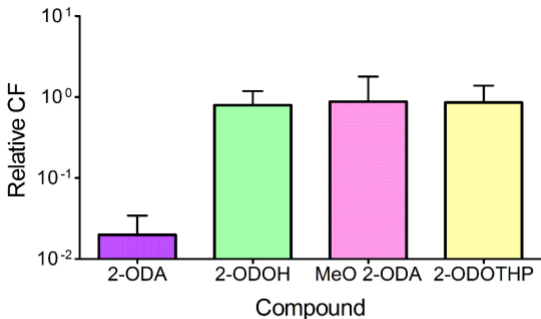

**Figure S1.** COIN activity of 2-ODA analogs. Conjugation frequency (CF) represented in logarithmic scale in the presence of 2-ODA and derivatives at 1 mM, relative to a control without added compounds ( $10^0$ ). Values represent the mean + SD of at least three independent experiments measured by HTC assay.
