# Supplementary material for: Synthetic Fatty Acids Prevent Plasmid-Mediated Horizontal Gene Transfer
Source: PubMed Central journal article supplement — mBio. 2015 Sep 1;6(5):e01032-15. doi: 10.1128/mBio.01032-15 (PMC4556808; doi:10.1128/mbio.01032-15), 2015-09-01
Supplement: mbo004152448sf2.pdf [file mbo004152448sf2.pdf]

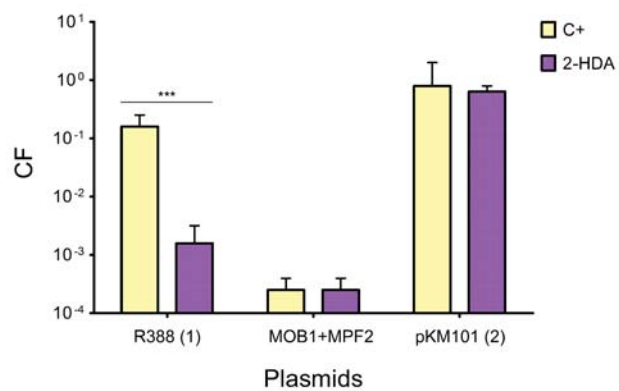

**Figure S2.** 2-HDA activity in plasmid mobilization. Conjugation frequency (CF) of R388 and pKM101 or mobilization frequency (MF) of *oriT*-MOB of R388 (pHP161) (E. Fernández-González, H. D. de Paz, A. Alperi, L. Agúndez, M. Faustmann, F. J. Sangari, C. Dehio, and M. Llosa, J. Bacteriol. 193:6257-65, 2011) using MPF apparatus of pKM101 (pKM101 $\Delta$ MOB) (O. Draper, C. E. César, C. Machón, F. de la Cruz, and M. Llosa, Proc. Natl. Acad. Sci. U.S.A. 102:16385-90, 2005) represented in the figure as MOB1+MPF2. Bars represent the mean + SD showed in logarithmic scale of at least three independent experiments measured by plate-conjugation assay in the presence or absence of 2-HDA 0.4 mM. C+, control in the absence of added COIN. Mean significantly different from control (yellow) with \*\*\*  $p < 0.001$ .
