# Supplementary material for: Synthetic Fatty Acids Prevent Plasmid-Mediated Horizontal Gene Transfer
Source: PubMed Central journal article supplement — mBio. 2015 Sep 1;6(5):e01032-15. doi: 10.1128/mBio.01032-15 (PMC4556808; doi:10.1128/mbio.01032-15), 2015-09-01
Supplement: mbo004152448sf4.pdf [file mbo004152448sf4.pdf]

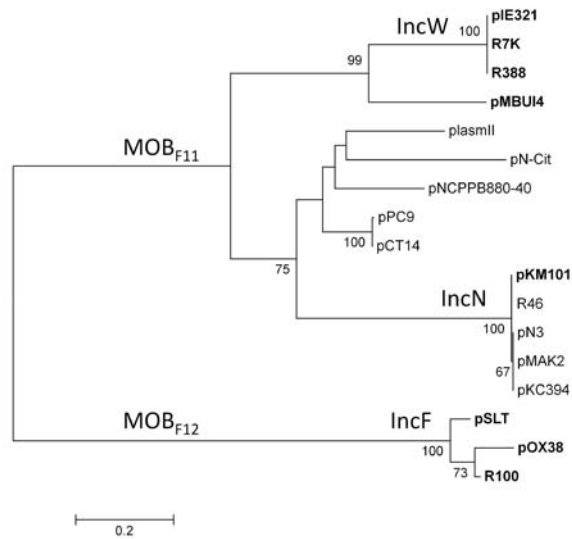

**Figure S4.** Phylogeny tree of MOB<sub>F11</sub> family relaxases. MOB<sub>F12</sub> relaxases of plasmids pSLT, pOX38 and R100 are used as outgroups. Bootstrap percentages (over 50 %) are shown adjacent to the node being considered. Name of the relaxase-containing plasmid is shown to the right of each branch. Conjugative plasmids tested (Table S1) are shown in bold. MOB and Inc groups of representative plasmids are presented on corresponding branches. Accession numbers of the relaxases shown in this figure: pIE321: YP\_001911166; R7K: YP\_001874877; R388: CAA44853; pMBUI4: AGH89046; plasmII: CAZ15872; pN-Cit: YP\_007354951; pNCPB880-40: YP\_006964196; pPC9: AGA76279; pCT14: YP\_001966297; pKM101: AAB97287; R46: NP\_511201; pN3: YP\_004558187; pMAK2: BAF93119; pKC394: YP\_003717510; pSLT: NP\_490592; pOX38: BAA97974; R100: NP\_052981.
