# Supplementary material for: Synthetic Fatty Acids Prevent Plasmid-Mediated Horizontal Gene Transfer
Source: PubMed Central journal article supplement — mBio. 2015 Sep 1;6(5):e01032-15. doi: 10.1128/mBio.01032-15 (PMC4556808; doi:10.1128/mbio.01032-15), 2015-09-01
Supplement: mbo004152448sf6.pdf [file mbo004152448sf6.pdf]

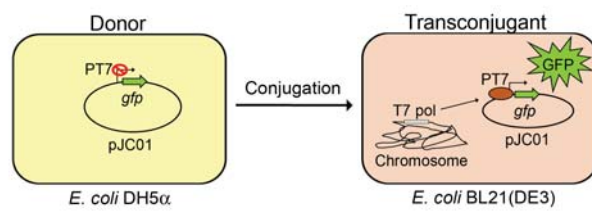

**Figure S6.** Schematic diagram of high throughput conjugation assay. T7 promoter is inactive in donor cells because it requires T7 polymerase; thus, GFP is not expressed. After conjugation, transmission of pJC01 can be detected by measuring fluorescence, since the receptor strain BL21 (DE3) express T7 polymerase allowing production of GFP. PT7, T7 promoter. T7 pol, T7 RNA polymerase. GFP, Green Fluorescence Protein.
