# Supplementary material for: Synthetic Fatty Acids Prevent Plasmid-Mediated Horizontal Gene Transfer
Source: PubMed Central journal article supplement — mBio. 2015 Sep 1;6(5):e01032-15. doi: 10.1128/mBio.01032-15 (PMC4556808; doi:10.1128/mbio.01032-15), 2015-09-01
Supplement: mbo004152448st1.pdf [file mbo004152448st1.pdf]

**Table S1.** Conjugative and mobilizable plasmids used

| Plasmid <sup>a</sup> | Inc <sup>b</sup> | MOB <sup>c</sup> | MPF <sup>d</sup> | Reference |
|----------------------|------------------|------------------|------------------|-----------|
| R388                 | W                | F11              | T                | (1)       |
| pSa                  | W                | F11              | T                | (2)       |
| pIE321               | W                | F11              | T                | (3)       |
| pIE522               | W                | F11              | T                | (3)       |
| R7K                  | W                | F11              | T                | (4)       |
| pMBUI4               | W                | F11              | T                | (5)       |
| pKM101               | N                | F11              | T                | (6)       |
| pOX38                | FI               | F12              | F                | (7)       |
| R1drd19              | FII              | F12              | F                | (8)       |
| R100-1               | FII              | F12              | F                | (9)       |
| pSLT                 | FII              | F12              | F                | (10)      |
| pRL443               | P1 $\alpha$      | P11              | T                | (11)      |
| R751                 | P1 $\beta$       | P11              | T                | (12)      |
| R64drd11             | I1 $\alpha$      | P12              | I                | (13)      |
| pCTX-M3              | L/M              | P131             | I                | (14)      |
| R6K                  | X2               | P3               | T                | (15)      |
| drR27                | HI1              | H11              | F                | (16)      |

|         |      |     |   |      |
|---------|------|-----|---|------|
| CloDF13 | ColE | C11 | - | (17) |
| ColE1   | ColE | P5  | - | (18) |
| RSF1010 | Q1   | Q11 | - | (19) |

<sup>a</sup> Conjugative and mobilizable plasmids used in plate-conjugation assays. <sup>b</sup> Inc, incompatibility group (20). <sup>c</sup> MOB, MOB group (21). <sup>d</sup> MPF, mating pair formation type (22). The hyphen represents the absence of MPF in mobilizable plasmids.

## References

1. Datta, N., Hedges, R. W. 1972. Trimethoprim resistance conferred by W plasmids in Enterobacteriaceae. *J. Gen. Microbiol.* 72:349-355.
2. Watanabe, T., Furuse, C., Sakaizumi, S. 1968. Transduction of various R factors by phage P1 in *Escherichia coli* and by phage P22 in *Salmonella typhimurium*. *J. Bacteriol.* 96:1791-1795.
3. Gotz, A., Pukall, R., Smit, E., Tietze, E., Prager, R., Tschape, H., van Elsas, J. D., Smalla, K. 1996. Detection and characterization of broad-host-range plasmids in environmental bacteria by PCR. *Appl. Environ. Microbiol.* 62:2621-2628.
4. Coetzee, J. N., Datta, N., Hedges, R. W. 1972. R factors from *Proteus rettgeri*. *J. Gen. Microbiol.* 72:543-552.

5. Brown, C. J., Sen, D., Yano, H., Bauer, M. L., Rogers, L. M., Van der Auwera, G. A., Top, E. M. 2013. Diverse broad-host-range plasmids from freshwater carry few accessory genes. *Appl. Environ. Microbiol.* 79:7684-7695.
6. Langer, P. J., Shanabruch, W. G., Walker, G. C. 1981. Functional organization of plasmid pKM101. *J. Bacteriol.* 145:1310-1316.
7. Chandler, M., Galas, D. J. 1983. Cointegrate formation mediated by Tn9. II. Activity of IS1 is modulated by external DNA sequences. *J. Mol. Biol.* 170:61-91.
8. Meynell, E., Datta, N. 1967. Mutant drug resistant factors of high transmissibility. *Nature* 214:885-887.
9. Yoshioka, Y., Ohtsubo, H., Ohtsubo, E. 1987. Repressor gene *finO* in plasmids R100 and F: constitutive transfer of plasmid F is caused by insertion of IS3 into F *finO*. *J. Bacteriol.* 169:619-623.
10. Camacho, E. M., Casadesus, J. 2002. Conjugal transfer of the virulence plasmid of *Salmonella enterica* is regulated by the leucine-responsive regulatory protein and DNA adenine methylation. *Mol. Microbiol.* 44:1589-1598.
11. Elhai, J., Vepritskiy, A., Muro-Pastor, A. M., Flores, E., Wolk, C. P. 1997. Reduction of conjugal transfer efficiency by three restriction activities of *Anabaena* sp. strain PCC 7120. *J. Bacteriol.* 179:1998-2005.

12. Thorsted, P. B., Macartney, D. P., Akhtar, P., Haines, A. S., Ali, N., Davidson, P., Stafford, T., Pocklington, M. J., Pansegrau, W., Wilkins, B. M., Lanka, E., Thomas, C. M. 1998. Complete sequence of the IncPbeta plasmid R751: implications for evolution and organisation of the IncP backbone. *J. Mol. Biol.* 282:969-990.
13. Komano, T., Funayama, N., Kim, S. R., Nisioka, T. 1990. Transfer region of IncI1 plasmid R64 and role of shufflon in R64 transfer. *J. Bacteriol.* 172:2230-2235.
14. Golebiewski, M., Kern-Zdanowicz, I., Zienkiewicz, M., Adamczyk, M., Zylinska, J., Baraniak, A., Gniadkowski, M., Bardowski, J., Ceglowski, P. 2007. Complete nucleotide sequence of the pCTX-M3 plasmid and its involvement in spread of the extended-spectrum beta-lactamase gene blaCTX-M-3. *Antimicrob. Agents. Chemother.* 51:3789-3795.
15. Kolter, R., Helinski, D. R. 1978. Construction of plasmid R6K derivatives in vitro: characterization of the R6K replication region. *Plasmid* 1:571-580.
16. Whelan, K. F., Maher, D., Colleran, E., Taylor, D. E. 1994. Genetic and nucleotide sequence analysis of the gene htdA, which regulates conjugal transfer of IncHI plasmids. *J. Bacteriol.* 176:2242-2251.
17. van Putten, A. J., Jochems, G. J., de Lang, R., Nijkamp, H. J. 1987. Structure and nucleotide sequence of the region encoding the mobilization proteins of plasmid CloDF13. *Gene* 51:171-178.

18. van Rensburg, A. J., Hugo, N. 1969. Characterization of DNA of colicinogenic factor E1 in a providence strain. *J. Gen. Microbiol.* 58:421-422.
19. Derbyshire, K. M., Hatfull, G., Willetts, N. 1987. Mobilization of the non-conjugative plasmid RSF1010: a genetic and DNA sequence analysis of the mobilization region. *Mol. Gen. Genet.* 206:161-168.
20. Taylor, D. E., Gibreel, A., Lawley, T. D., Tracz, D. M. 2004. Antibiotic resistance plasmids, p 473-491. *In* Funnel BE, Phillips GJ (ed), *Plasmid Biology*. ASM Press, Washington, DC.
21. Garcillan-Barcia, M. P., Francia, M. V., de la Cruz, F. 2009. The diversity of conjugative relaxases and its application in plasmid classification. *FEMS Microbiol. Rev.* 33:657-687.
22. Guglielmini, J., Quintais, L., Garcillan-Barcia, M. P., de la Cruz, F., Rocha, E. P. 2011. The repertoire of ICE in prokaryotes underscores the unity, diversity, and ubiquity of conjugation. *PLoS Genet.* 7:e1002222.
